# Supplementary material
Source: ML conference proceedings conference paper supplement (https://aclanthology.org/2025.codi-1.7)
Supplement: SupplementaryMaterial [file experiment1_control.pdf › fig/experiment1_control.pdf]

## Researcher Label

**Consq    Arg    Enum    Excpt**

GPT2

.07

.11

.05

.04

GPT-Neo-1.3B

.16

.08

.05

.13

Mistral-7B-v0.1

.11

.11

.08

.21
