# Supplementary material
Source: ML conference proceedings conference paper supplement (https://aclanthology.org/2025.codi-1.7)
Supplement: SupplementaryMaterial [file experiment1_top_k.pdf › fig/experiment1_top_k.pdf]

|       | Baseline | GPT2 |     |     | GPT-Neo-1.3B |     |     | Mistral-7B-v0.1 |     |     |
|-------|----------|------|-----|-----|--------------|-----|-----|-----------------|-----|-----|
|       |          | 1    | 3   | 5   | 1            | 3   | 5   | 1               | 3   | 5   |
| Acc.  | .45      | .51  | .74 | .85 | .56          | .78 | .88 | .59             | .80 | .89 |
| Prec. | .45      | .51  | .29 | .22 | .56          | .31 | .24 | .59             | .33 | .24 |
| Rec.  | .22      | .37  | .61 | .75 | .40          | .65 | .81 | .43             | .68 | .81 |
| F1    | .30      | .41  | .39 | .33 | .45          | .41 | .36 | .48             | .43 | .36 |
