# Supplementary material
Source: ML conference proceedings conference paper supplement (https://aclanthology.org/2025.codi-1.7)
Supplement: SupplementaryMaterial [file experiment2_accuracy.pdf › fig/experiment2_accuracy.pdf]

| Suprisal Metric           |  |           |  |  | Acc. | Avg # Token |     |       |
|---------------------------|--|-----------|--|--|------|-------------|-----|-------|
| $k =$                     |  |           |  |  | 1    | 3           | 5   |       |
| Mean                      |  |           |  |  | .56  | .78         | .88 | 13.45 |
| Superlinear ( $n = 0.5$ ) |  |           |  |  | .63  | .83         | .91 |       |
| Maximum                   |  |           |  |  | .51  | .73         | .85 |       |
| Variance                  |  |           |  |  | .52  | .72         | .85 |       |
| Difference                |  |           |  |  | .54  | .75         | .87 |       |
| Ours                      |  |           |  |  |      |             |     |       |
| Pre-ROOT                  |  | Top 3 MVT |  |  |      |             |     |       |
| ✓                         |  |           |  |  | .61  | .81         | .91 | 3.54  |
|                           |  | ✓         |  |  | .54  | .75         | .88 | 3     |
| ✓                         |  | ✓         |  |  | .64  | .84         | .93 | 2.73  |
