# Supplementary material
Source: ML conference proceedings conference paper supplement (https://aclanthology.org/2025.codi-1.7)
Supplement: SupplementaryMaterial [file experiment_1_top_k_accuracy.pdf › fig/experiment_1_top_k_accuracy.pdf]

Majority .45

|         | GPT2 |     |     | GPT-Neo-1.3B |     |            | Mistral-7B-v0.1 |     |            |
|---------|------|-----|-----|--------------|-----|------------|-----------------|-----|------------|
| $k =$   | 1    | 3   | 5   | 1            | 3   | 5          | 1               | 3   | 5          |
| Overall | .51  | .74 | .85 | .56          | .78 | .88        | .59             | .80 | <b>.89</b> |
| Consq   | .36  | .52 | .61 | .39          | .64 | .75        | .41             | .68 | <b>.84</b> |
| Arg     | .45  | .75 | .89 | .44          | .71 | <b>.94</b> | .41             | .73 | .93        |
| Enum    | .41  | .68 | .81 | .43          | .78 | <b>.86</b> | .59             | .73 | .84        |
| Excpt   | .40  | .65 | .77 | .43          | .64 | .77        | .48             | .72 | <b>.79</b> |
