# Supplementary material
Source: ML conference proceedings conference paper supplement (https://aclanthology.org/2025.codi-1.7)
Supplement: SupplementaryMaterial [file function_with_paraphrase_and_definition.pdf › fig/function_with_paraphrase_and_definition.pdf]

| Function        | Description                                                                  | Paraphrase                                                             | Example                                                                                            |
|-----------------|------------------------------------------------------------------------------|------------------------------------------------------------------------|----------------------------------------------------------------------------------------------------|
| CONSEQUENCE     | If the situation in [LHS] doesn't occur, the situation in [RHS] would arise. | [LHS] because if not [LHS], [RHS]                                      | [I like you too.] <sub>LHS</sub><br>Otherwise, [we wouldn't be friends.] <sub>RHS</sub>            |
| ↪ ARGUMENTATION | [RHS] is <i>undesirable</i> and can be possibly avoided by following [LHS]   | To avoid [RHS], [LHS]                                                  | [We have to operate immediately.] <sub>LHS</sub><br>Otherwise, [she will die.] <sub>RHS</sub>      |
| ENUMERATION     | It doesn't take the failure of [LHS] to consider [RHS] as another option.    | There are more than one option for [goal]:<br>They are [LHS] and [RHS] | [I like a nice curry.] <sub>LHS</sub><br>Otherwise, [I'll nibble on fruit.] <sub>RHS</sub>         |
| EXCEPTION       | [LHS] is an exception to [RHS]                                               | Generally [RHS], an exception is that [LHS].                           | [There were people riding horses.] <sub>LHS</sub><br>Otherwise, [there was nobody.] <sub>RHS</sub> |
