# Supplementary material
Source: ML conference proceedings conference paper supplement (https://aclanthology.org/2025.codi-1.7)
Supplement: SupplementaryMaterial [file three_way_example.pdf › fig/three_way_example.pdf]

*Why* should I take  
my umbrella?

Take your umbrella. *Otherwise*,

- (a) you'll get wet (CONSEQUENCE)
- (b) bring a raincoat (ENUMERATION)
- (c) it's best to travel light (EXCEPTION)

*Because*  
you'll get wet!
