# Supplementary material
Source: ML conference proceedings conference paper supplement (https://aclanthology.org/2025.codi-1.7)
Supplement: SupplementaryMaterial [file top_1_distribution.pdf › fig/top_1_distribution.pdf]

# Researcher Label

| Top 1 Label     | Consq |     |      |       | Arg   |     |      |       | Enum  |     |      |       | Excpt |     |      |       |
|-----------------|-------|-----|------|-------|-------|-----|------|-------|-------|-----|------|-------|-------|-----|------|-------|
|                 | Consq | Arg | Enum | Excpt |
| GPT2            | .36   | .32 | .14  | .18   | .21   | .45 | .22  | .12   | .08   | .35 | .41  | .16   | .20   | .23 | .17  | .40   |
| GPT-Neo-1.3B    | .39   | .21 | .27  | .12   | .29   | .44 | .17  | .10   | .16   | .24 | .43  | .16   | .12   | .19 | .27  | .43   |
| Mistral-7B-v0.1 | .41   | .30 | .20  | .09   | .30   | .41 | .23  | .07   | .03   | .27 | .59  | .11   | .04   | .27 | .21  | .48   |
