# Supplementary material
Source: ML conference proceedings conference paper supplement (https://aclanthology.org/2025.codi-1.7)

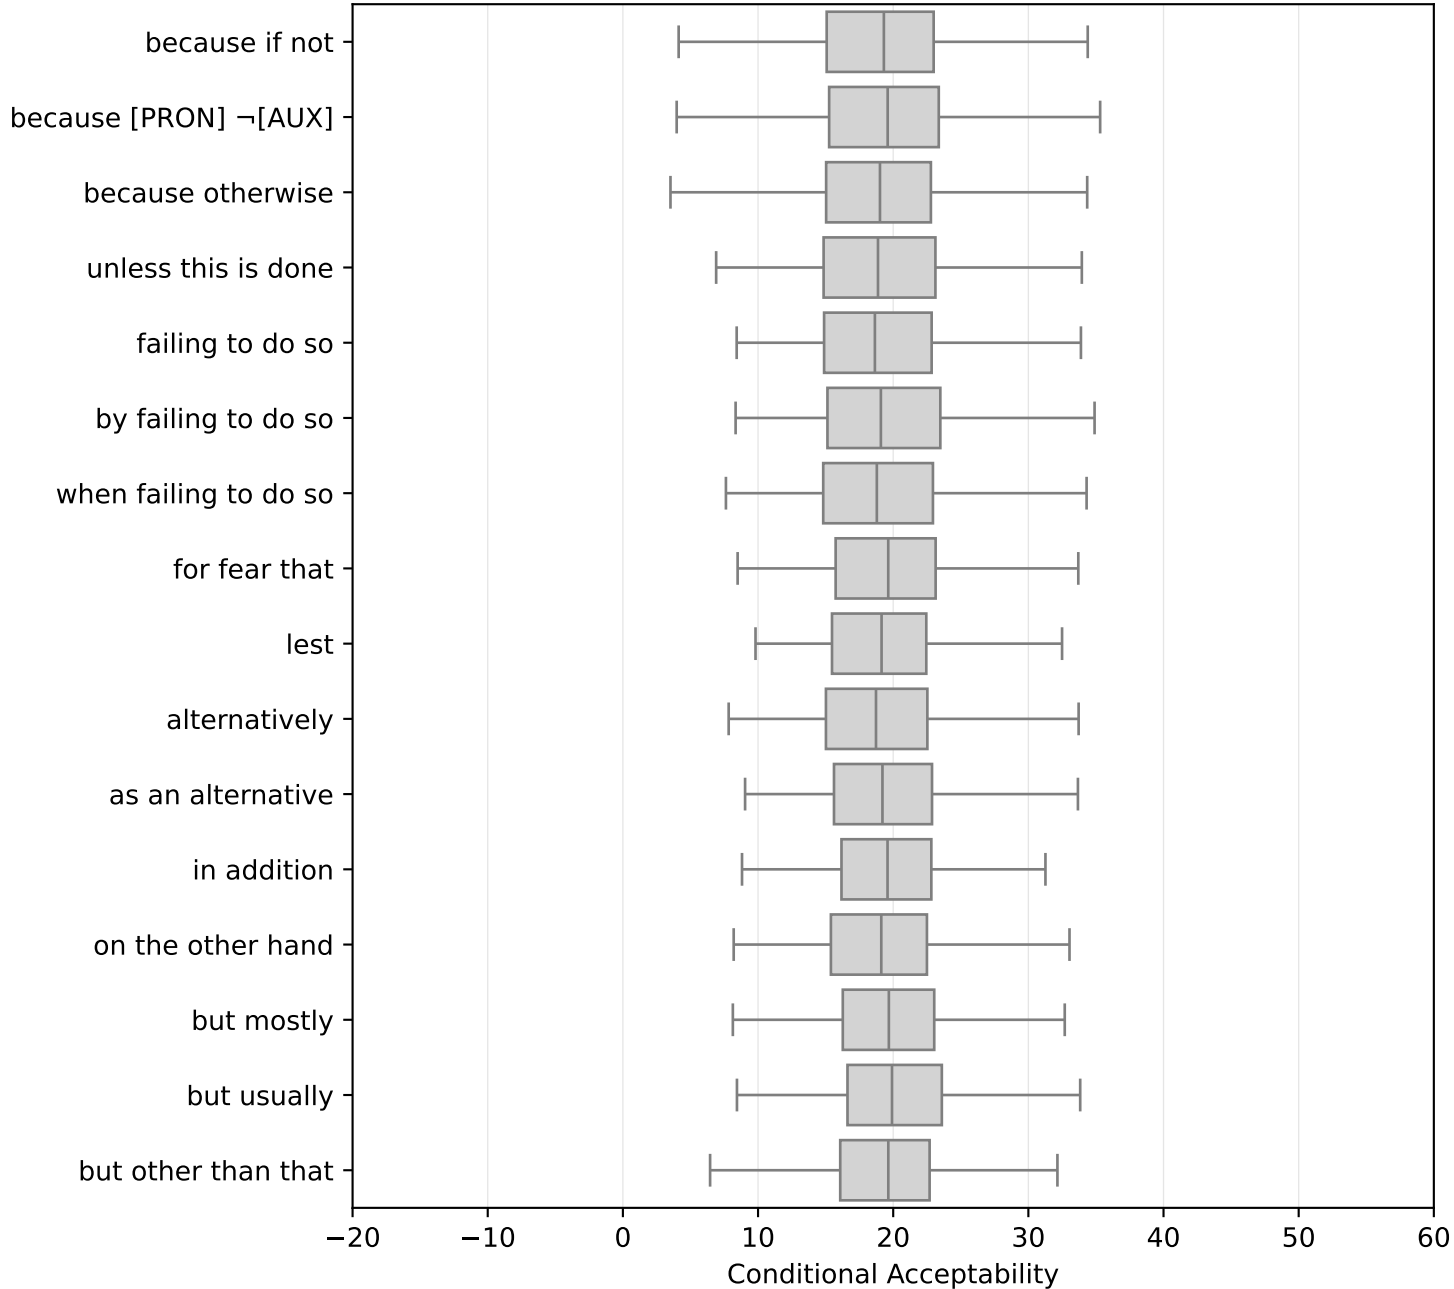

Supplement: SupplementaryMaterial [file marker_distribution.pdf › fig/marker_distribution.pdf]
